# Supplementary material for: Blonanserin HCl salt and its monohydrate
Source: Royal Society of Chemistry journal article supplement (doi:10.1039/c2ce06367k), 2011-12-16
Supplement: c2ce06367k.pdf [file c2ce06367k.pdf]

## Electronic Supplementary Information (ESI)†

### Blonanserine HCl salt and its monohydrate

D. Maddileti, Ranjit Thakuria, Suryanarayan Cherukuvada, and Ashwini Nangia\*

School of Chemistry, University of Hyderabad, Prof. C. R. Rao Road, Gachibowli,  
Central University PO, Hyderabad 500 046, India

E-mail: [ashwini.nangia@gmail.com](mailto:ashwini.nangia@gmail.com)

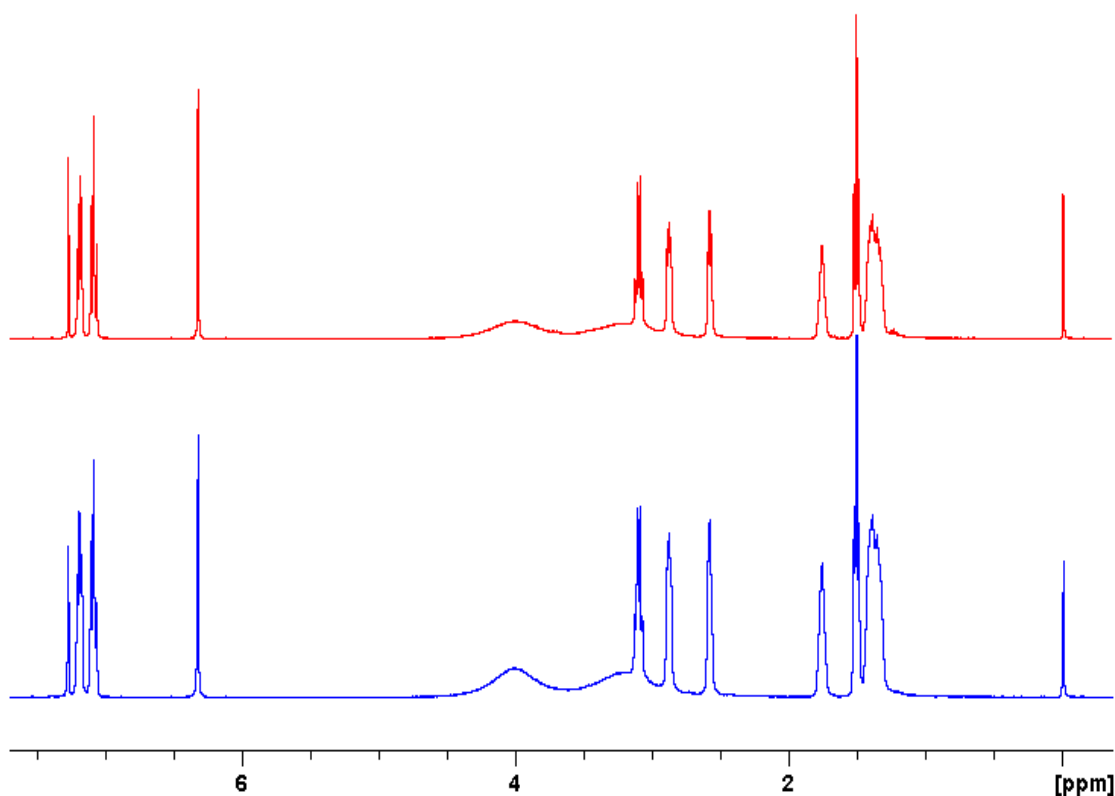

**Figure S1**  $^1\text{H}$  NMR ( $\text{CDCl}_3$  solution) of room temperature form (red) and high temperature form (blue) of BLN HCl. The solution NMR spectra confirm chemical integrity of the sample during the heating process; that there is no drug decomposition during heating.

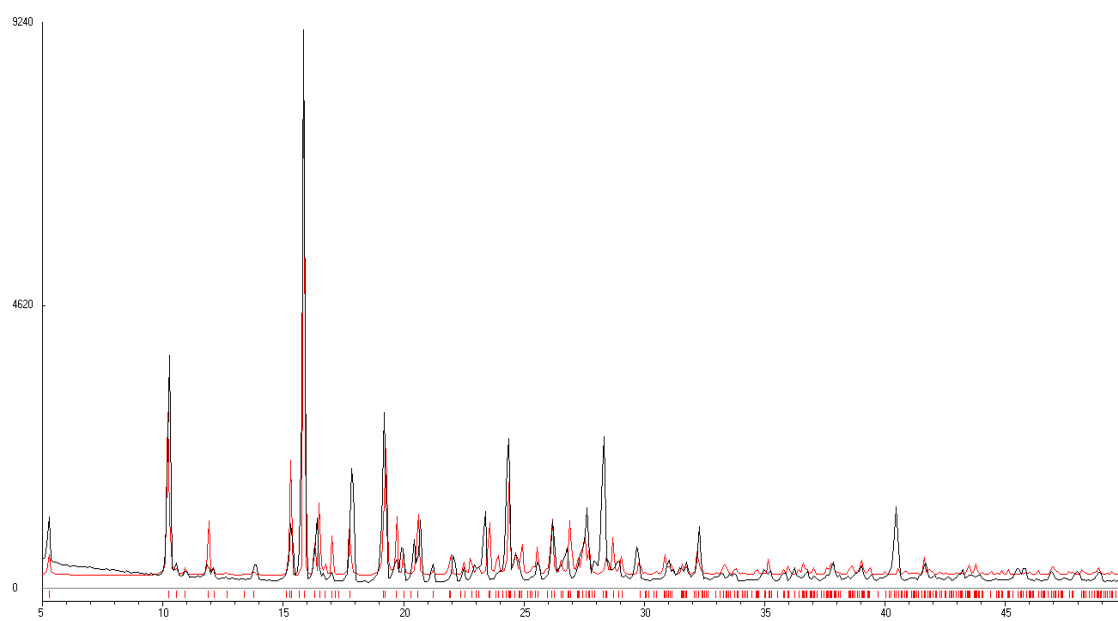

(a)

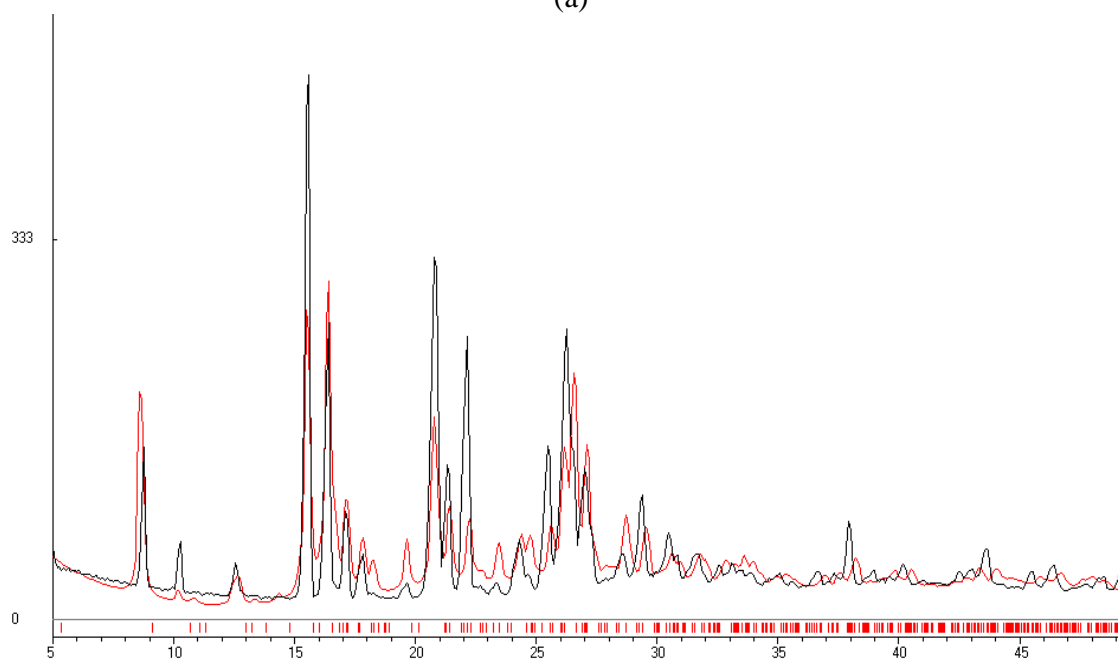

(b)

**Figure S2** Experimental (black) and calculated (red) powder X-ray diffraction pattern of (a) BLN HCl RT form and (b) BLN HCl monohydrate. The bulk material matches with the single crystalline phase.
